# Supplementary material
Source: PubMed Central journal article supplement (PMC4109765)
Supplement: supp_M049759_jlr.M049759-2.pdf [file supp_M049759_jlr.M049759-2.pdf]

**Table S1.** Shape, field and global similarity scores (SSim, FSim and Sim, respectively) for the best alignments of compounds quercetin, (+)-taxifolin and SKI II to luteolin, as calculated by Forge. Numer of conformations (Confs) and alignments (Alns) generated are also shown.

|               | Sim   | FSim  | SSim  | Confs | Alns |
|---------------|-------|-------|-------|-------|------|
| quercetin     | 0.869 | 0.775 | 0.964 | 20    | 10   |
| (+)-taxifolin | 0.915 | 0.868 | 0.961 | 93    | 10   |
| SKI II        | 0.719 | 0.616 | 0.822 | 13    | 10   |
