# Supplementary material
Source: PubMed Central journal article supplement (PMC4109765)
Supplement: supp_M049759_jlr.M049759-3.pdf [file supp_M049759_jlr.M049759-3.pdf]

**Table S2.** Interaction energies (kcal/mol; Van der Waals:  $E_{VdW}$ , Coulomb:  $E_{Coul}$ , Hydrogen Bonding:  $E_{HB}$ , Total:  $E_{int}$ ) of proximal, intermediate and distal poses of SKI II with main interacting residues of CB5R.

| Pose         | Residue | $E_{VdW}$ | $E_{Coul}$ | $E_{HB}$ | $E_{int}$ |
|--------------|---------|-----------|------------|----------|-----------|
| Proximal     | T181    | -3,35     | -1,01      | 0,00     | -4,36     |
|              | G274    | -3,92     | -1,76      | -0,15    | -5,82     |
|              | P275    | -4,00     | 0,18       | 0,00     | -3,81     |
|              | F300    | -1,03     | -6,60      | -0,15    | -7,78     |
|              | FAD     | -8,15     | -2,05      | 0,00     | -10,20    |
| Intermediate | G179    | -2,59     | -2,00      | -0,31    | -4,90     |
|              | Q210    | -3,90     | -1,21      | -0,04    | -5,15     |
|              | P275    | -3,62     | -0,05      | 0,00     | -3,67     |
|              | FAD     | -3,62     | -1,83      | 0,00     | -5,46     |
| Distal       | Q210    | -1,66     | -2,86      | -0,03    | -4,82     |
|              | F251    | -7,26     | 0,90       | 0,00     | -6,36     |
|              | P277    | -3,97     | -0,26      | 0,00     | -4,23     |
|              | M278    | -3,91     | -0,34      | 0,00     | -4,25     |
|              | F281    | -4,88     | 0,12       | 0,00     | -4,76     |
