# Supplementary material
Source: PubMed Central journal article supplement (PMC4109765)
Supplement: supp_M049759_jlr.M049759-4.pdf [file supp_M049759_jlr.M049759-4.pdf]

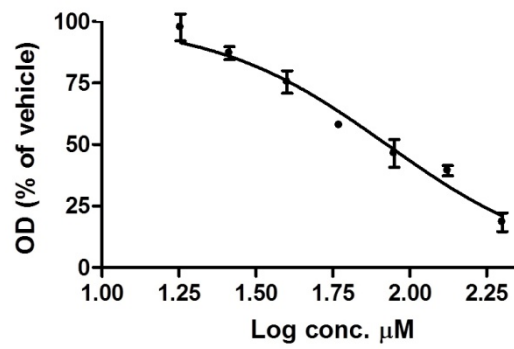

**Figure S1.** Effect of SKI II on cell viability. HGC 27 cells were treated with different concentrations of SKI II for 24 h and the number of viable cells was determined by the MTT test. Data correspond to the average  $\pm$  SD of two independent experiments with triplicates. Curve adjustment with the four parameter logistic equation rendered a  $\text{LD}_{50}$  value of 84  $\mu\text{M}$ .
