# Supplementary material
Source: PubMed Central journal article supplement (PMC4109765)
Supplement: supp_M049759_jlr.M049759-5.pdf [file supp_M049759_jlr.M049759-5.pdf]

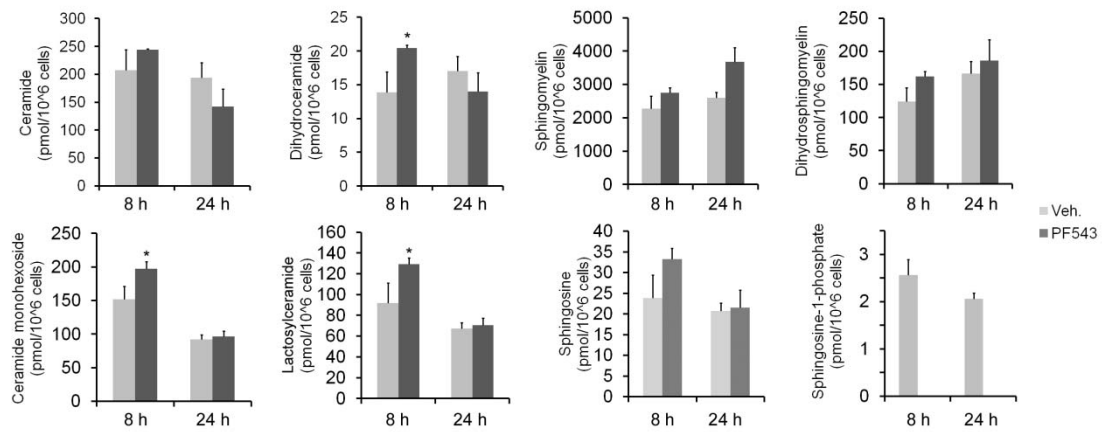

**Figure S2.** Effect of PF-543 on the spingolipid composition of HGC 27 cells. Cells were treated with either vehicle (control) (light gray) or 1  $\mu$ M PF-543 (dark gray) for the indicated times, cells were collected, and lipids were extracted and analyzed as detailed in the experimental section. Data correspond to the average  $\pm$  SD of two experiments with triplicates. The asterisk denotes statistical significance of treatments *versus* control at  $p \leq 0.05$  (unpaired, two-tail  $t$  test).
