# Supplementary material
Source: PubMed Central journal article supplement (PMC4109765)
Supplement: supp_M049759_jlr.M049759-6.pdf [file supp_M049759_jlr.M049759-6.pdf]

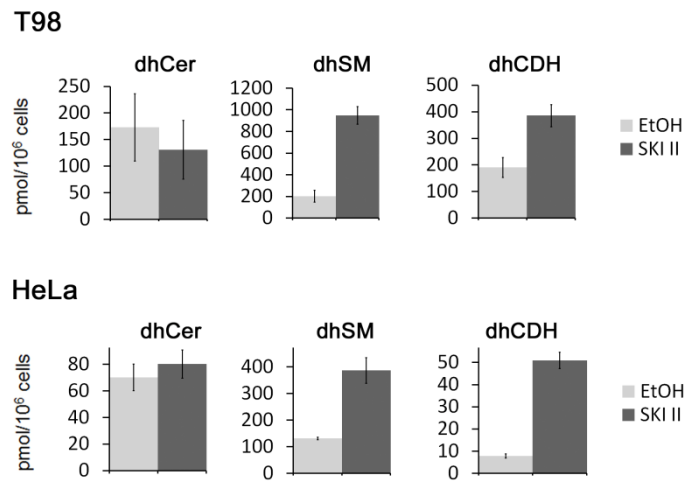

**Figure S3.** Effect of SKI II on the dihydrosphingolipid composition of T98 and HeLa cells. Cells were treated with either vehicle (EtOH) or 10  $\mu$ M SKI II for 24 h, cells were collected, and lipids were extracted and analyzed as detailed in the experimental section. Data correspond to the average  $\pm$  SD of two experiments with triplicates. In both cell lines, the means between controls and SKI II treated cells were statistically significant for dhSM and dhCDH ( $p \leq 0.05$ , unpaired, two-tail  $t$  test).
