# Supplementary material
Source: PubMed Central journal article supplement (PMC4109765)
Supplement: supp_M049759_jlr.M049759-7.pdf [file supp_M049759_jlr.M049759-7.pdf]

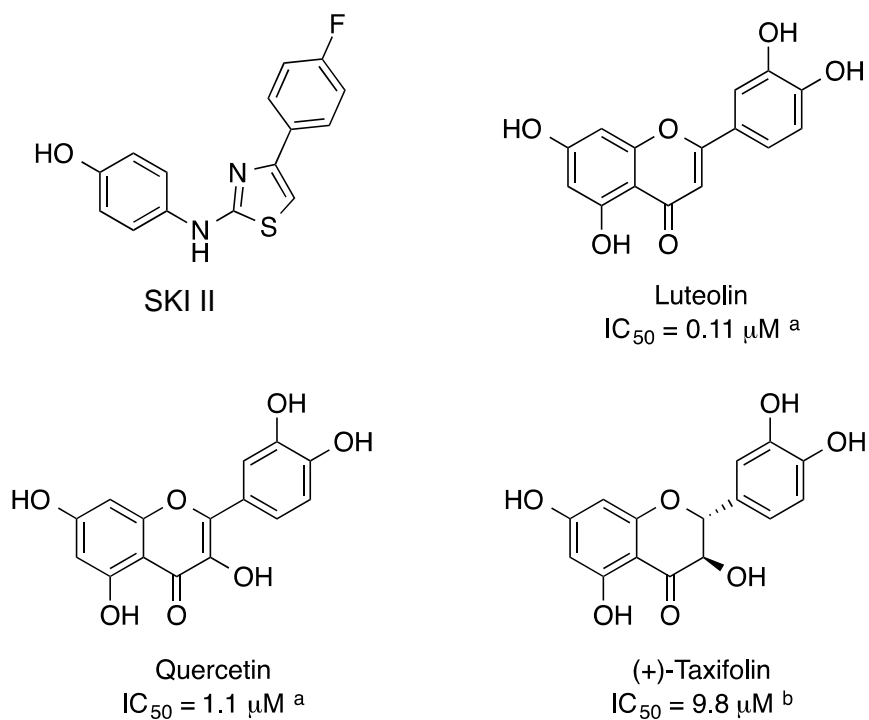

**Figure S4.** Structure of SKI II and some flavonoids which are known inhibitors of CB5R. Reported inhibitory activity ( $IC_{50}$ ) for flavonoids is included (<sup>a</sup> Çelik, H., Kosar, M. (2012) *Chem. Biol. Int.* **197**, 103-109. <sup>b</sup> Çelik, H., Kosar, M., Arinç, E. (2013) *Toxicology* **308**, 34-40).
