# Supplementary material
Source: PubMed Central journal article supplement (PMC4109765)
Supplement: supp_M049759_jlr.M049759-9.pdf [file supp_M049759_jlr.M049759-9.pdf]

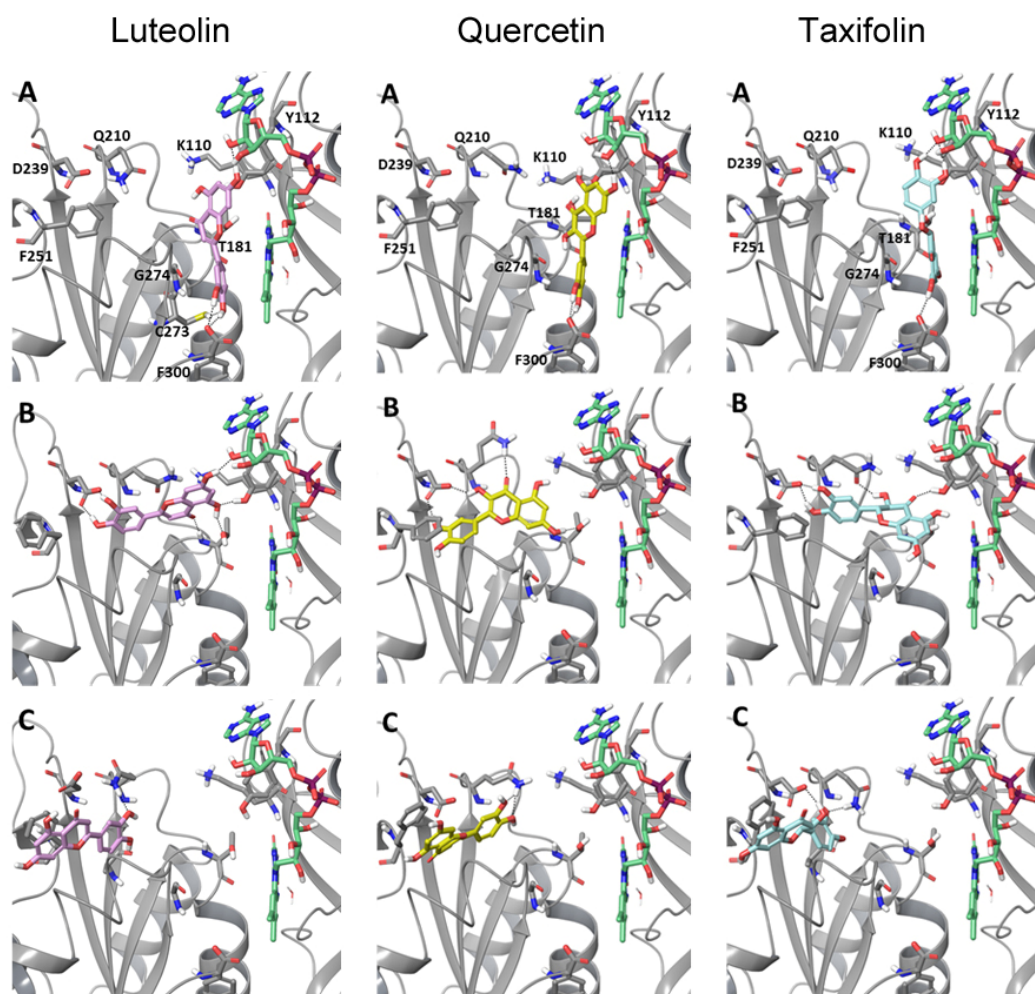

**Figure S6.** Docked poses of luteolin (pink), quercetin (yellow) and (+)-taxifolin (cyan) at the NADH binding site on CB5R. Residues interacting with the ligand are labelled. Docking scores: luteolin: (A) -7.67, (B) -8.89, and (C) -6.93 kcal/mol; quercetin: (A) -7.94, (B) -8.34, and (C) -7.70 kcal/mol; (+)-taxifolin: (A) -7.81, (B) -8.04, and (C) -7.09 kcal/mol.
